# Supplementary material for: SPINK7 Expression Changes Accompanied by HER2, P53 and RB1 Can Be Relevant to Predict Oral Squamous Cell Carcinoma at Molecular Level
Source: Research Square preprint supplement (doi:10.21203/rs.3.rs-108017/v1), 2020-11-30
Supplement: Supplementary file 1 [file 3dfd7c25ffffe7bb67c990b3.docx]

**SPINK7 expression changes accompanied by HER2, P53 and RB1 can be relevant to predict oral squamous cell carcinoma at molecular level**

Gina Pennacchiotti, DMD1,7; Fabio Valdés Garrido, MD2; Wilfredo A González-Arriagada, PhD3; Héctor F Montes, MD4; Judith MR Parra, DMD5; Valeria A Guida, DMD5; Silvina E Gómez, Bsc6; Martín E Guerrero-Gimenez, MD6; Juan M Fernandez-Muñoz, Bsc6; Felipe CM Zopino, PhD6; Rubén W Carón, PhD6; Marcelo E Ezquer, PhD7; Ricardo Fernández-Ramires, PhD8 and Flavia A Bruna, PhD5,6,7.


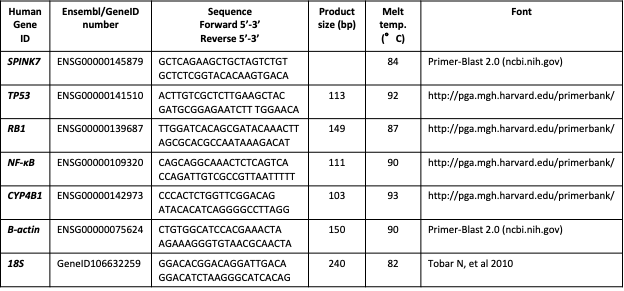


**Supplementary table 1. Primers data used in the qPCR analysis**
